# Supplementary material for: Prediction and analysis of three gene families related to leaf rust (Puccinia triticina) resistance in wheat (Triticum aestivum L.)
Source: PubMed Central journal article supplement (PMC5477749; doi:10.1186/s12870-017-1056-9), 2017-06-20

**Table S1.** The eight families of the plant ABC transporter superfamily, their domain organization and major functions in Arabidopsis

| Family | Domain organization               | Feature                                                              | Major function                                                                                                                                                                  |
|--------|-----------------------------------|----------------------------------------------------------------------|---------------------------------------------------------------------------------------------------------------------------------------------------------------------------------|
| A      | (TMD-NBD) <sub>2</sub> or TMD-NBD | Full-size or half size; forward orientation                          | Lipid transport                                                                                                                                                                 |
| B      | (TMD-NBD) <sub>2</sub> or TMD-NBD | Full-size or half size; forward orientation                          | Transport of auxin, secondary metabolites and xenobiotics                                                                                                                       |
| C      | (TMD-NBD) <sub>2</sub>            | Full-size; forward orientation                                       | Phytate transport, xenobiotic transport, folate storage, vacuolar compartmentation of anthocyanin                                                                               |
| D      | (TMD-NBD) <sub>2</sub> or TMD-NBD | Full-size or half size; forward orientation                          | Fatty acid beta-oxidation, fatty-acyl-CoA transport, IBA (indole-3-butyric acid) transport, peroxisomal import of fatty acids                                                   |
| E      | NBD-NBD                           | Soluble (no membrane-bound TMD)                                      | Ribosomal subunit export from nucleus, translational initiation/termination, suppression of RNA silencing                                                                       |
| F      | NBD-NBD                           | Soluble (no membrane-bound TMD)                                      | Ribosome recycling and translational control, defense response to bacterium, response to cadmium ion                                                                            |
| G      | NBD-TMD                           | Gwbc group; half size; reverse orientation                           | Kanamycin resistance, transmembrane transport, jasmonate response, salicylic acid response                                                                                      |
|        | (NBD-TMD) <sub>2</sub>            | Gpdr group; full size; reverse orientation; plant/fungus specific    | Pathogen defense response, cuticle formation, drug transmembrane transport, organic hydroxy compound transport, p-coumaryl alcohol transport, regulation of lignin biosynthesis |
| I      | TMD or NBD or CYT or SBP          | Only one ABC-related domain, similar to prokaryotic ABC transporters | Cytochrome complex assembly, heme transport, protein complex assembly, respiratory chain complex IV assembly                                                                    |

Abbreviations: TMD: transmembrane domain, NBD: nucleotide-binding domain (ATP-binding cassette), CYT: conserved soluble protein which interacts with ABC domain, SSA: substrate binding protein, WBC: white-brown complex, PDR: pleiotropic drug resistance

**Table S2.** The VEP annotation of SNPs used for leaf rust resistance association studies linked to the genes in the ABC, NLR and START families and other genomic regions in wheat

|                         | ABC | NLR | START | OTHERS <sup>1</sup> |
|-------------------------|-----|-----|-------|---------------------|
| Coding                  | 5   | 6   | 1     | 714                 |
| Stop codon <sup>2</sup> | 0   | 0   | 0     | 27                  |
| Intron <sup>3</sup>     | 2   | 0   | 0     | 114                 |
| 5'UTR                   | 0   | 0   | 0     | 26                  |
| 3'UTR                   | 3   | 2   | 3     | 210                 |
| Upstream                | 1   | 4   | 0     | 222                 |
| Downstream              | 2   | 1   | 2     | 356                 |
| Intergenic              |     |     | 174   |                     |

<sup>1</sup> SNPs were annotated within or 5 Kb upstream or downstream of the genes not in the ABC, NLR and START families. <sup>2</sup> SNPs affect stop codons including gain or loss. <sup>3</sup> SNPs are located in an intron including splice sites such as splice acceptor or donor

**Figure S1.** The Venn diagram (A) of the SNP markers of leaf rust resistance QTLs ( $P \leq 0.01$ ) for seedling and adult stages downloaded from the T3 database and their distribution on different wheat chromosomes (B: seedling; C: adult)

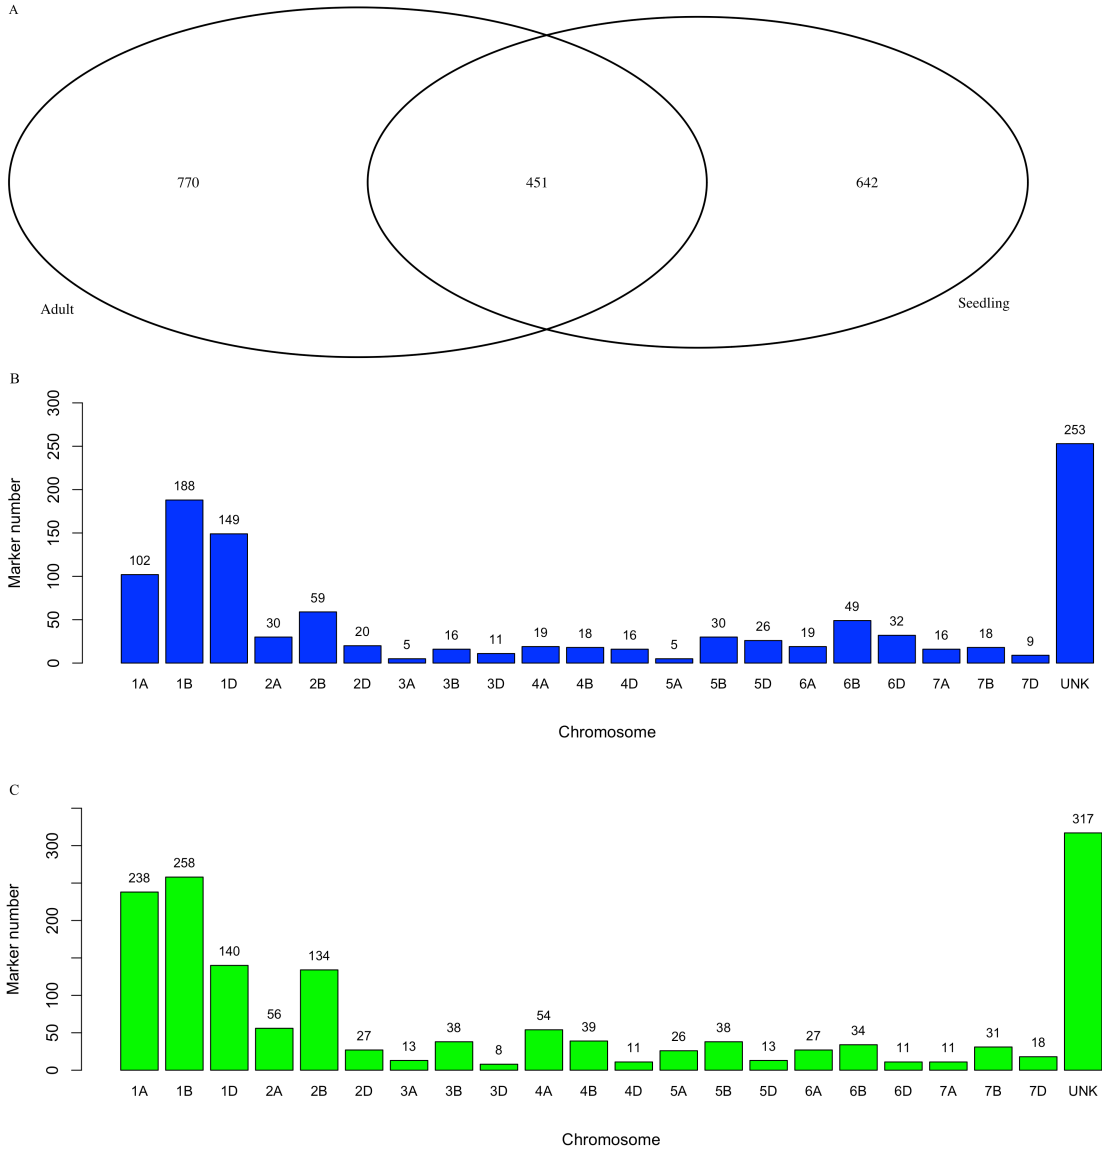

Supplement: 12870_2017_1056_MOESM3_ESM.pdf [file 12870_2017_1056_MOESM3_ESM.pdf]
